# Supplementary material for: N-glycosylation and receptor tyrosine kinase signaling affect claudin-3 levels in colorectal cancer cells
Source: PubMed Central journal article supplement — Oncol Rep. 2020 Aug 11;44(4):1649–61. doi: 10.3892/or.2020.7727 (PMC7448416; doi:10.3892/or.2020.7727), 2020-08-11
Supplement: Supplementary_Data.pdf [file Supplementary_Data.pdf]

Figure S1. *N*-glycan related enzymes. The three glycoenzymes (which encode glycosyltransferases) analyzed in the study were *MGAT5*, *ST6GAL1*, and *B3GNT8*. *N*-acetylglucosaminyltransferase V (*MGAT5*) catalyzes the transfer of GlcNAc in a  $\beta$ 1,6 linkage, generating branched *N*-glycans. *ST6GAL1* is a sialyltransferase that adds a terminal  $\alpha$ 2-6-linked sialic acid to the *N*-glycan. *B3GNT8* transfers GlcNAc to the nonreducing terminus of Gal $\beta$ 1-4GlcNAc on  $\beta$ 1,6-branched *N*-glycan during the biosynthesis of poly-*N*-acetylglucosamine chains.

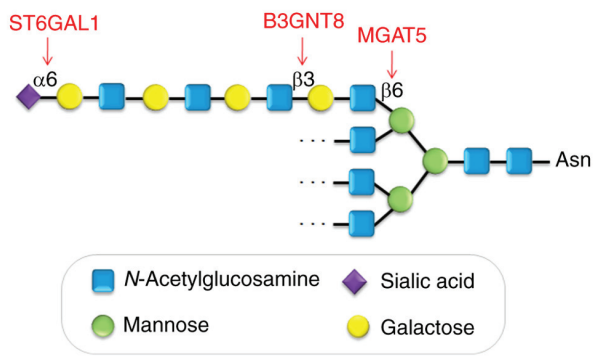

Table SI. Clinicopathological features of the patients (N=14) with colorectal cancer who were analyzed in this study.

| Clinicopathological features   | Data  |
|--------------------------------|-------|
| Sex, ratio                     |       |
| Male/Female                    | 5/9   |
| Mean age (years) <sup>a</sup>  | 64±10 |
| Location, n                    |       |
| Terminal ileum and right colon | 4     |
| Right colon                    | 4     |
| Left colon                     | 1     |
| Sigmoid colon                  | 5     |
| Histology <sup>b</sup> , n     |       |
| Well                           | 1     |
| Moderately                     | 11    |
| Mucinous                       | 2     |
| TNM stage, n                   |       |
| 0                              | 1     |
| I                              | 2     |
| II                             | 5     |
| III                            | 6     |

<sup>a</sup>Values are mean ± standard deviation. <sup>b</sup>Well, well-differentiated adenocarcinoma; moderately, moderately differentiated adenocarcinoma, with or without mucinous areas, or undifferentiated adenocarcinoma; mucinous, mucinous adenocarcinoma.
